# Supplementary material for: The IL-17B-IL-17 receptor B pathway promotes resistance to paclitaxel in breast tumors through activation of the ERK1/2 pathway
Source: Oncotarget. 2017 Dec 6;8(69):113360–72. doi: 10.18632/oncotarget.23008 (PMC5768333; doi:10.18632/oncotarget.23008)
Supplement: Supplementary file 1 [file oncotarget-08-113360-s001.pdf]

# The IL-17B-IL-17 receptor B pathway promotes resistance to paclitaxel in breast tumors through activation of the ERK1/2 pathway

## SUPPLEMENTARY MATERIALS

Supplementary Table 1: Characteristics of breast cancer patients' cohort

|                                     | IL17B sample number | IL17RB sample number |
|-------------------------------------|---------------------|----------------------|
| Background                          | 24                  | 24                   |
| Tumor                               | 86                  | 104                  |
| <b>NPI Stage</b>                    |                     |                      |
| NPI-1                               | 42                  | 51                   |
| NPI-2                               | 30                  | 35                   |
| NPI-3                               | 10                  | 14                   |
| <b>Grade</b>                        |                     |                      |
| Grade 1                             | 11                  | 19                   |
| Grade 2                             | 24                  | 34                   |
| Grade 3                             | 49                  | 49                   |
| <b>TNM stage</b>                    |                     |                      |
| TNM 1                               | 40                  | 54                   |
| TNM 2                               | 31                  | 35                   |
| TNM 3                               | 6                   | 6                    |
| TNM 4                               | 3                   | 4                    |
| TNM 2,3,4                           | 40                  | 45                   |
| <b>Prognosis</b>                    |                     |                      |
| Disease free                        | 61                  | 72                   |
| With metastasis                     | 6                   | 7                    |
| With local recurrence               | 3                   | 5                    |
| Died of breast cancer               | 10                  | 13                   |
| All breast cancer related incidence | 19                  | 25                   |
| ER negative                         | 55                  | 63                   |
| ER positive                         | 25                  | 31                   |
| ER beta negative                    | 62                  | 75                   |
| ER beta positive                    | 20                  | 21                   |

A

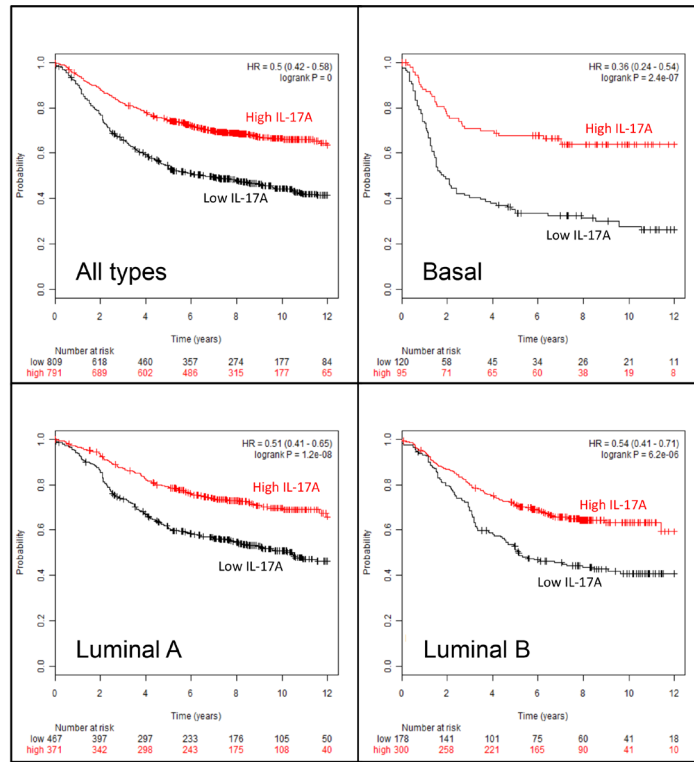

B

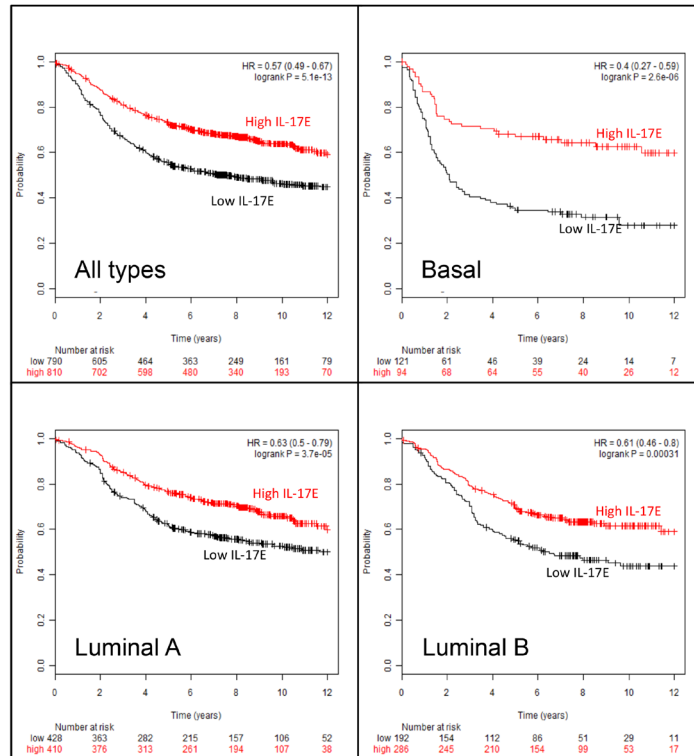

**Supplementary Figure 1: Correlations between IL-17A or IL-17E expression and clinical outcome breast cancer patients.** (A, B) Prognostic effect of IL-17A (A) and IL-17E (B) expression in the whole population and in patients with basal-like, luminal A or luminal B breast cancer assessed using the Kaplan-Meier method. Data were compared with the log-rank test. The median was taken as threshold for high IL-17A or IL-17E expression. Cohort size = 1809 patients, database 2012, collection of Affymetrix chips.

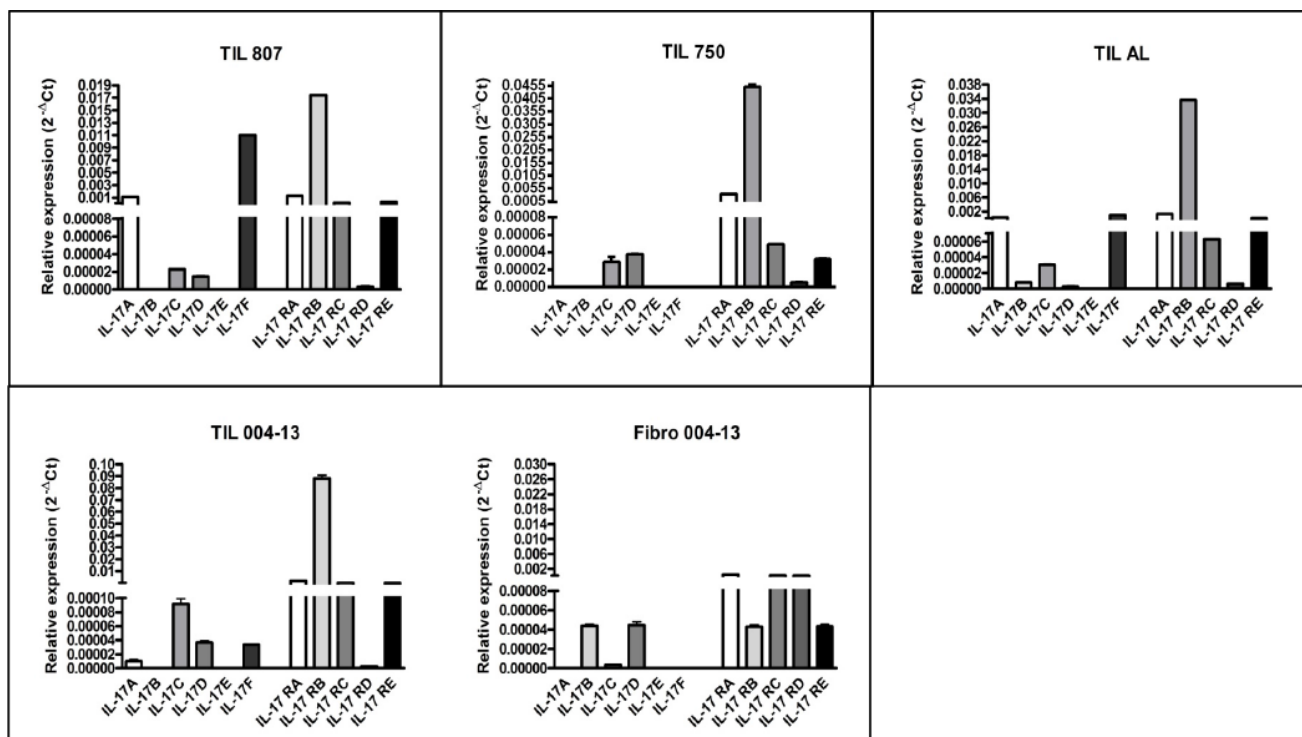

**Supplementary Figure 2: Expression of IL-17 cytokines and their receptors in breast tumor infiltrated lymphocytes.** Tumor infiltrating lymphocytes (TIL) and cancer-associated fibroblasts (fibro) were isolated from fresh biopsies and mRNA expression for IL-17 cytokines (IL-17A, IL-17B, IL-17C, IL-17D, IL-17E and IL-17F) and their receptors (IL-17RA, IL-17RB, IL-17RC, IL-17RD and IL-17RE) analyzed by qRT-PCR. Expression was normalized to the GAPDH mRNA expression. Data are the mean  $\pm$  SEM of one or two experiments performed in duplicate.

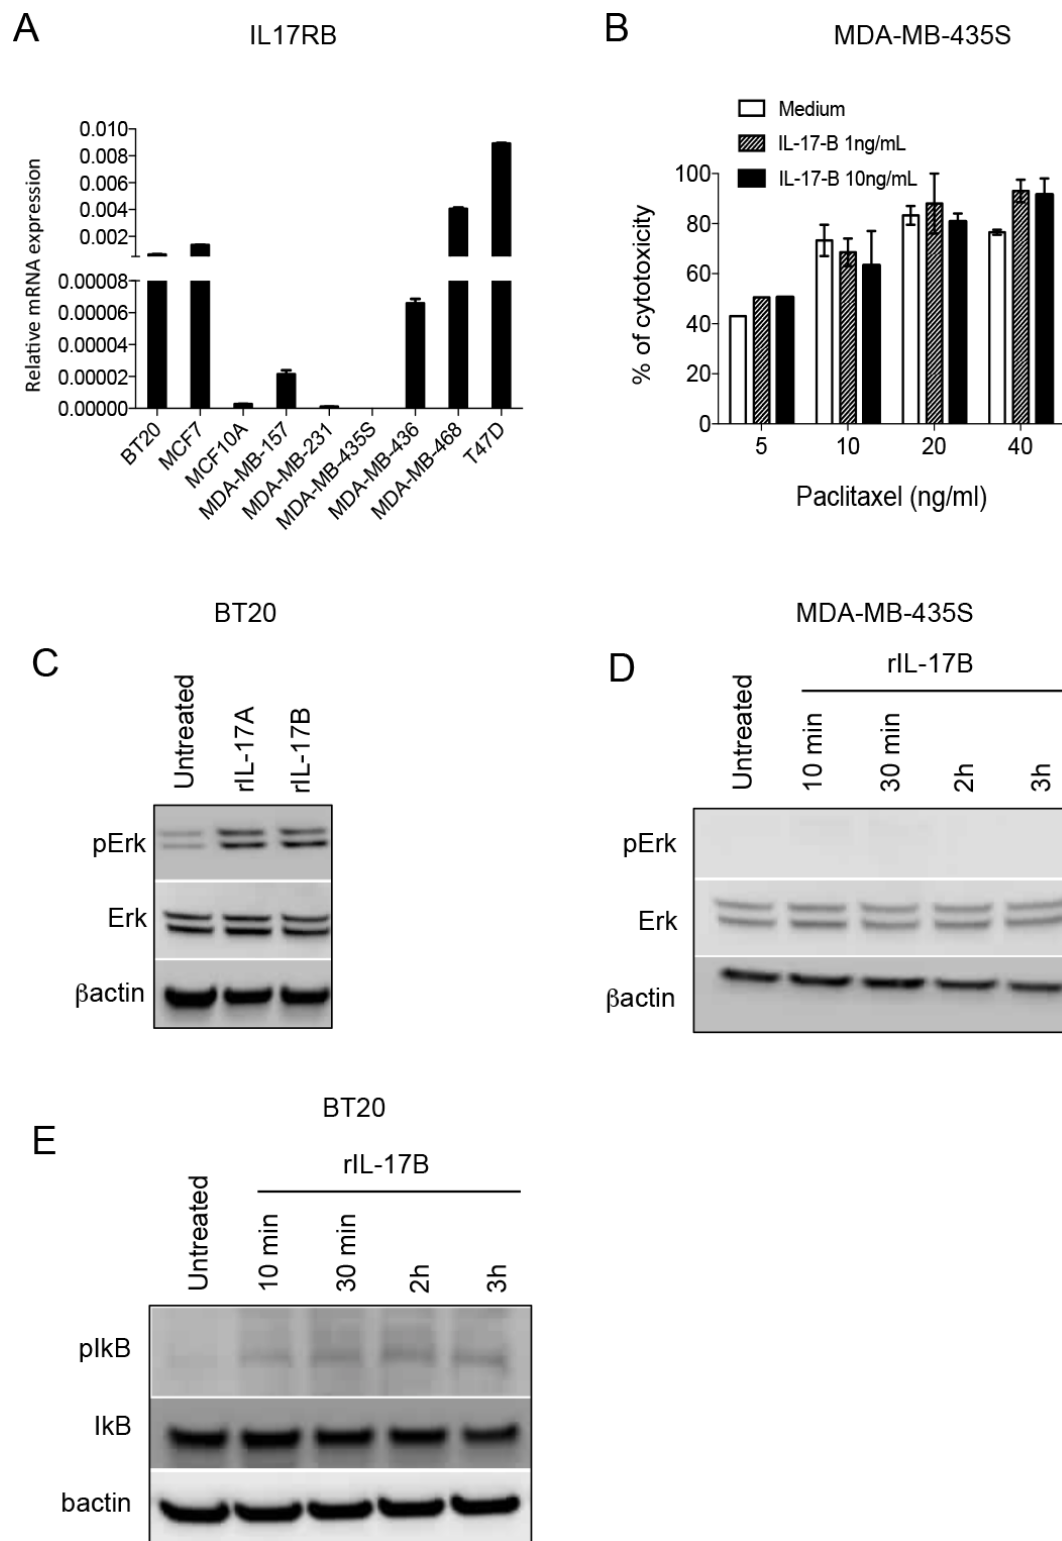

**Supplementary Figure 3: Analysis of IL-17RB expression, IL-17B-induced chemoresistance and signaling pathways in breast cancer cell lines.** (A) Comparison of IL-17RB expression in breast cancer cell lines determined by qRT-PCR. Expression was normalized to the GAPDH mRNA expression. (B) Percentages of drug-induced cell cytotoxicity in MDA-MB-435S cells cultured in FCS-free medium completed or not with 1 or 10 ng/mL rIL-17B for 24 h and treated with paclitaxel at concentrations ranging from 5  $\mu$ g/mL to 40  $\mu$ g/mL for 7 h. (C, D) Western blot analysis of ERK1/2 phosphorylation (pErk) in BT20 stimulated or not with 10 ng/mL rIL-17A or rIL-17B for 30 min (C) or in MDA-MB-435S (D) for different times. Total ERK and  $\beta$ -actin were used as protein loading control. (E) Western blot analysis of I $\kappa$ B phosphorylation (pI $\kappa$ B) in BT20 stimulated or not with 10 ng/mL rIL-17B for different times. Total I $\kappa$ B and  $\beta$ -actin were used as protein loading control. Results are representative of at least 2 experiments.

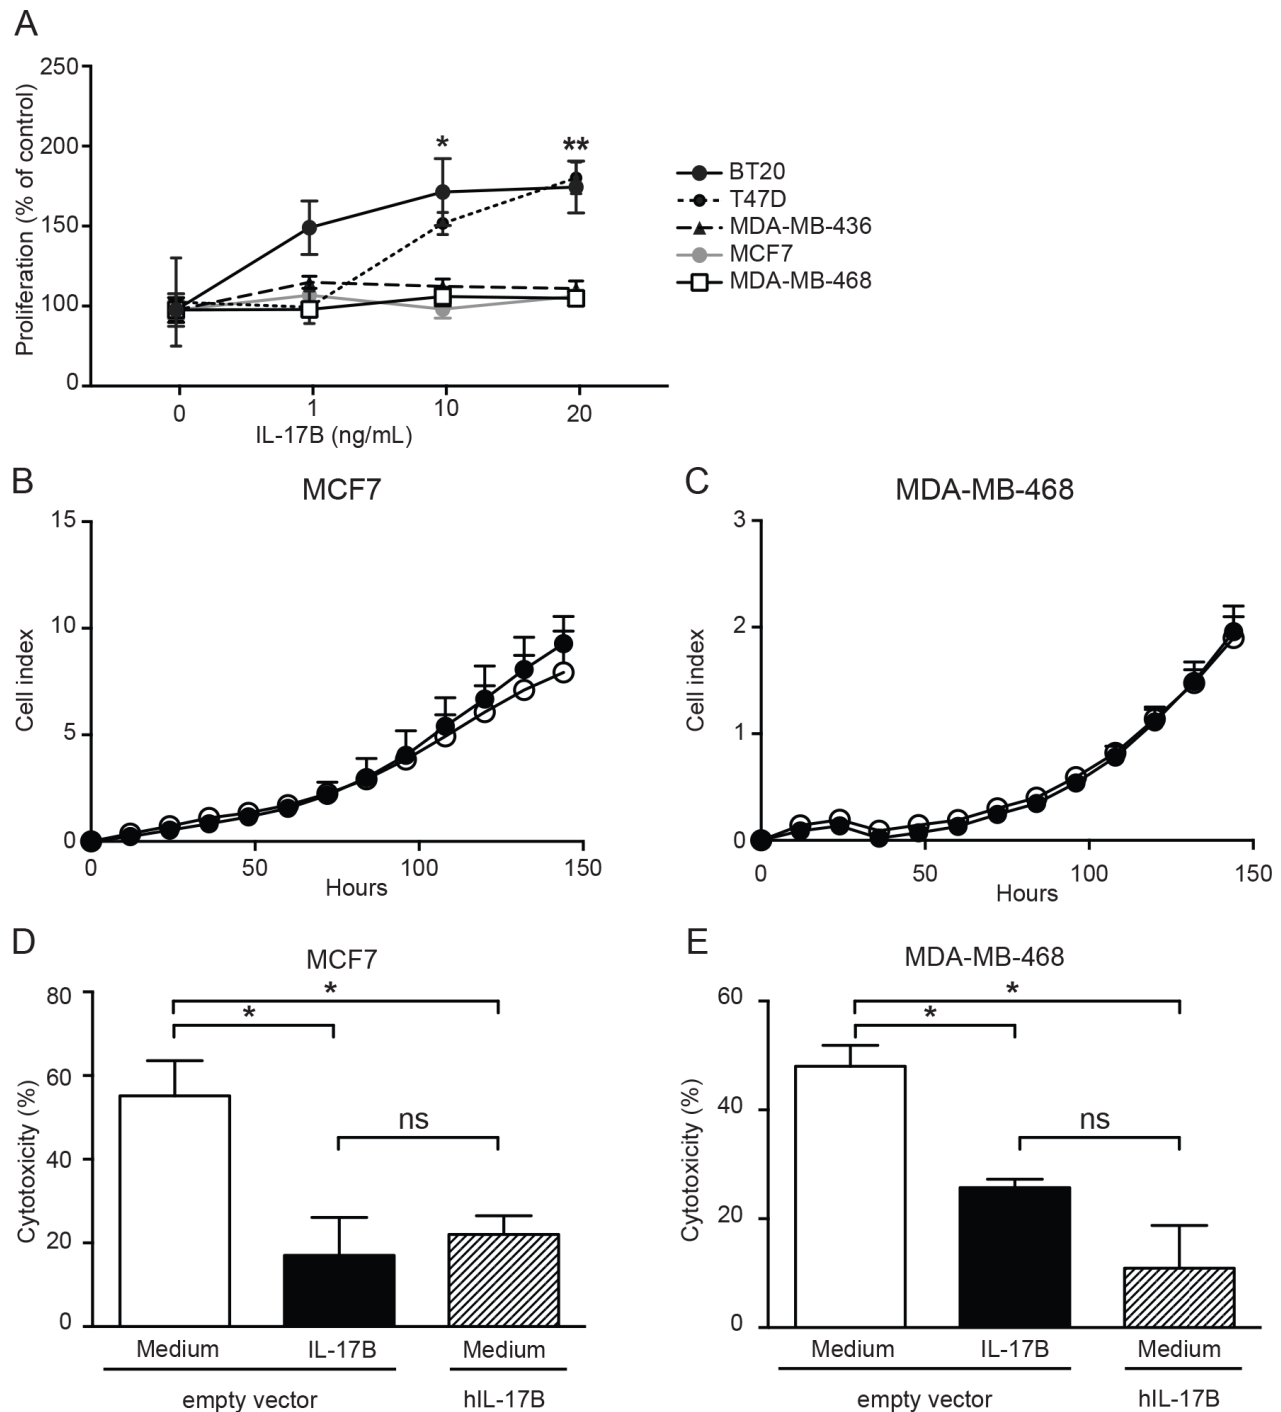

**Supplementary Figure 4: IL-17B promotes resistance to paclitaxel independently of its effect on cell proliferation.**

(A) Cell proliferation determined by  $^3\text{H}$ -TdR uptake in MDA-MB-468, BT20, MCF7, T47D and MDA-MB-436 breast cancer cells lines incubated with recombinant human IL-17B (0 to 20 ng/ml) for 72 h. Experiments were performed in hexaplicate ( $n = 2$  for MDA-MB-468, BT20, and MDA-MB-436;  $n = 1$  for T47D and MCF7). (B, C) Cell proliferation of MCF7 (B) and MDA-MB-468 (C) cells overexpressing (hIL-17B) or not (empty vector) human IL-17B monitored with the Xcelligence system every 3 h and up to 150 h. (D, E) Percentages of drug-induced cell cytotoxicity in MCF7 (D) cells and MDA-MB-468 (E) cells expressing hIL-17B incubated with 5  $\mu\text{g/mL}$  or 40  $\mu\text{g/mL}$  paclitaxel respectively for 7 h compared with parental cells and cells transfected with empty vector incubated or not with rIL-17B. For A, multi-comparison was done with the Kruskal-Wallis test with Dunn's post-test and for (D, E), the Student's  $t$ -test was used to compare control and treatment groups.  $*p < 0.05$ .
